# Supplementary material
Source: Springer Nature journal article supplement (https://www.springermedizin.de/resource/supplementary/12913_2011_2335_MOESM3_ESM.pdf/9530236)

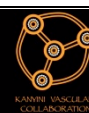

# Kanyini Audit Study- XYZ Health Service Feedback Report

## XYZ Health Service

|                 |       |
|-----------------|-------|
| Records audited | 200   |
| Mean age        | 42.9  |
| % Male          | 43.5% |
| % Female        | 56.5% |

## National

|                 |       |
|-----------------|-------|
| Records audited | 1165  |
| Mean age        | 41.1  |
| % Male          | 40.5% |
| % Female        | 59.5% |

## Recorded Past History

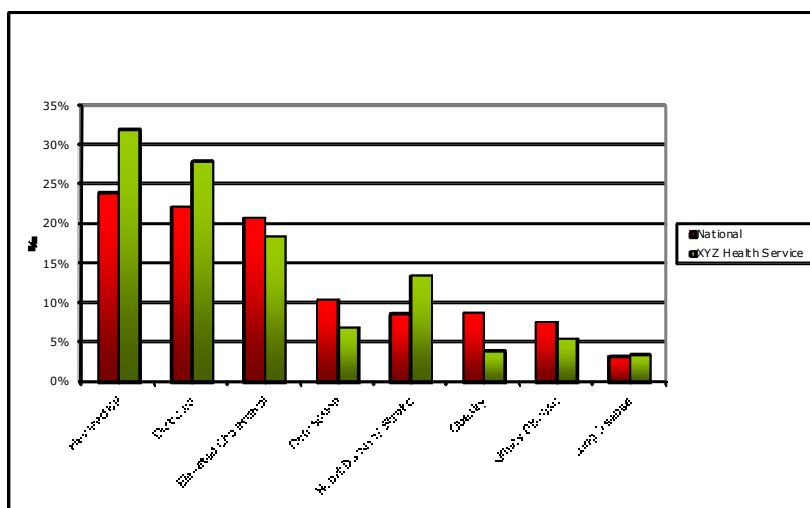

**Comment:**  
*These specific recorded conditions were looked for in this audit. The results do not reflect all recorded conditions found in the case record*

## Risk Factor Recording

### Smoking status

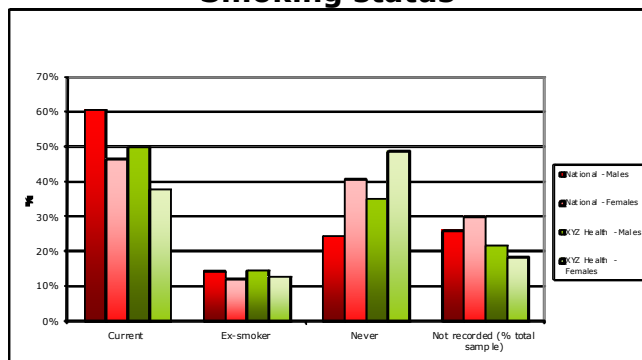

### Body Mass Index

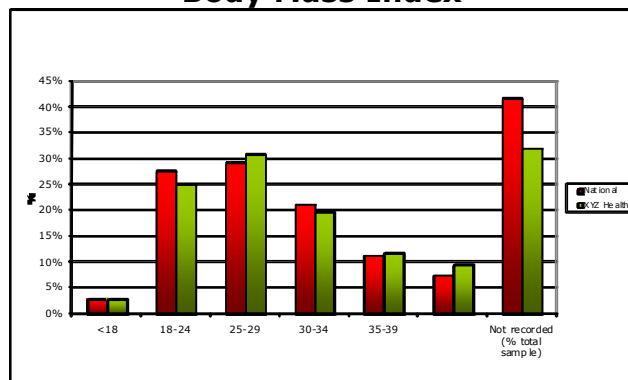

### Albuminuria

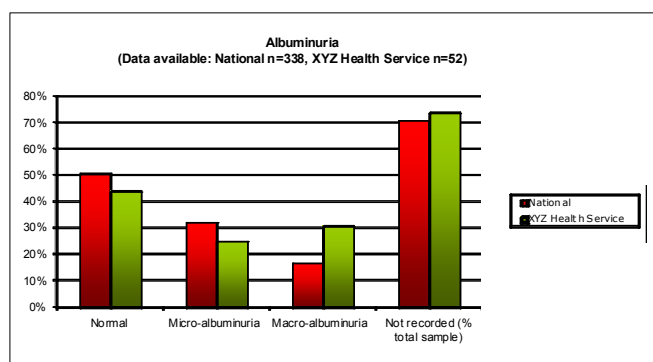

### Chronic Kidney Disease

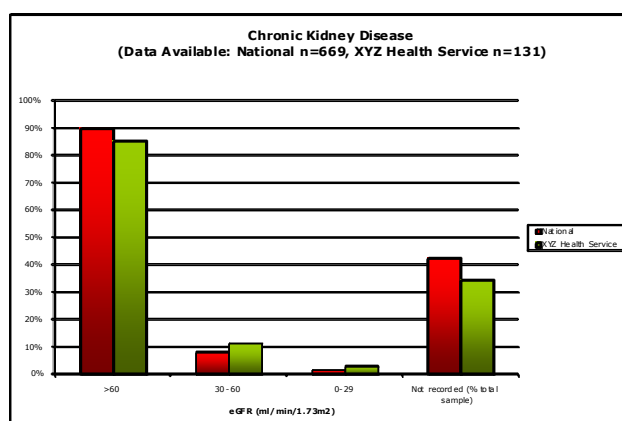

## Summary of risk factor recording

|                               | XYZ Health<br>(n=39) | National<br>(n=1165) |
|-------------------------------|----------------------|----------------------|
| <b>Risk factor recorded</b>   | <b>%</b>             | <b>%</b>             |
| Blood Pressure                | 98.5%                | 90.2                 |
| Blood glucose                 | 91.5%                | 78.9                 |
| Smoking status                | 80.0%                | 71.4                 |
| Lipids                        | 67.0%                | 58.9                 |
| eGFR                          | 65.5%                | 57.4                 |
| Body Mass Index (BMI)         | 59%                  | 55.7                 |
| Albumin Creatine Ratio (ACR)  | 26.0%                | 29.0                 |
| ACR and eGFR for at risk CKD* | 32.5%                | 31.8                 |

**Comment:**  
 People 'at risk of Chronic Kidney Disease (CKD)' is based on Kidney Health Australia guidelines and includes any one of the following:

- Age > 50 years
- BP > 140/90 mmHg
- Diabetes
- Current smoker
- BMI ≥ 30 kg/m<sup>2</sup>

\* n=151 for XYZ, n=851 for National

## Diabetes Profile

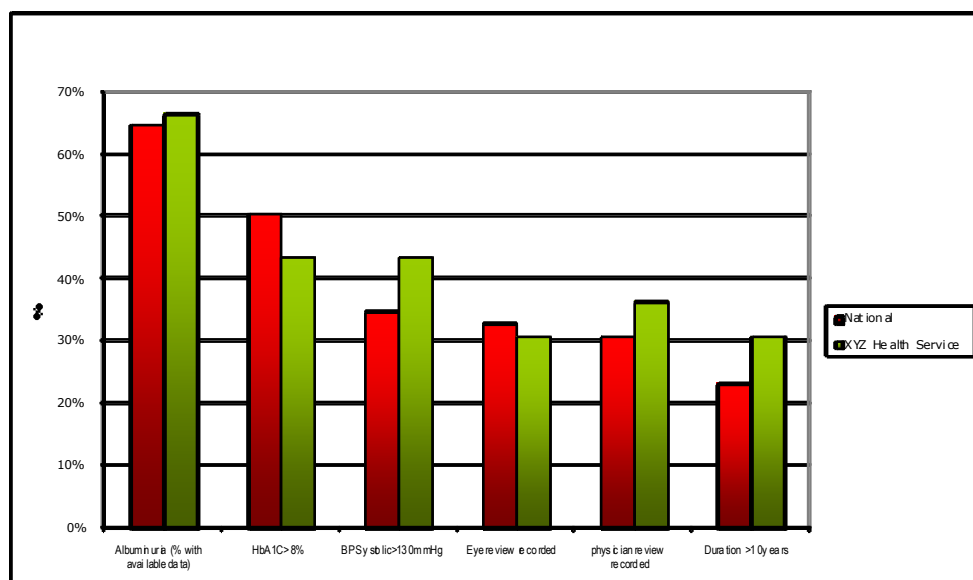

**Comment:**  
 Only 36 of 55 people with diabetes had sufficient data to record albuminuria

## Cardiovascular risk profile

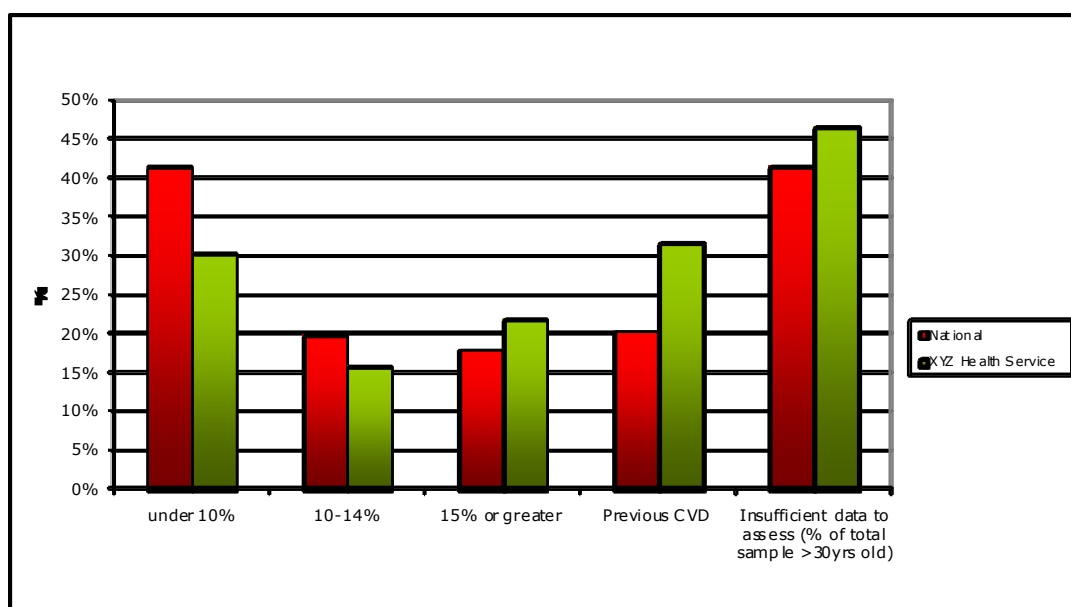

**Comment:**  
 Cardiovascular risk is calculated using the Framingham based New Zealand Cardiovascular Guidelines. This includes a 5% addition to the risk calculation for Indigenous populations.

The risk assessment algorithm is not validated for under 30 year olds

\*Sufficient data were only available for 82 of 154 people in the sample aged over 30 years old and therefore results should be interpreted with caution

## Care provided

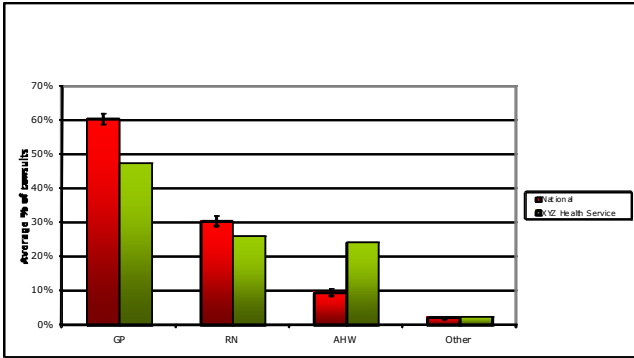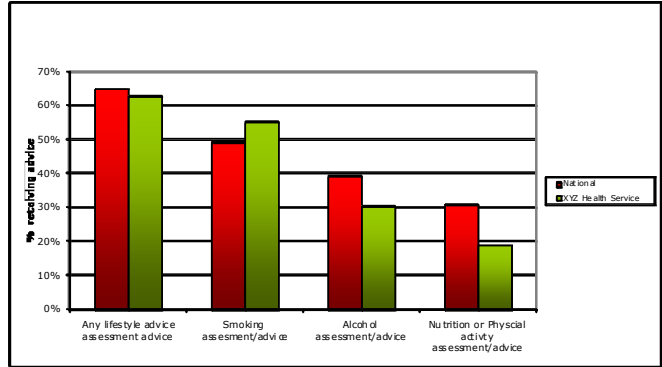

### Comment:

Lifestyle assessment was recorded as present if there was any evidence in the clinical record of discussion with the client about smoking, nutrition, physical activity or alcohol in the past 2 years

## Enhanced Primary Care Items

EPC Medicare Items- XYZ Health Service  
(For item 710 n=156, 704 n=44, 721-725 n=66)

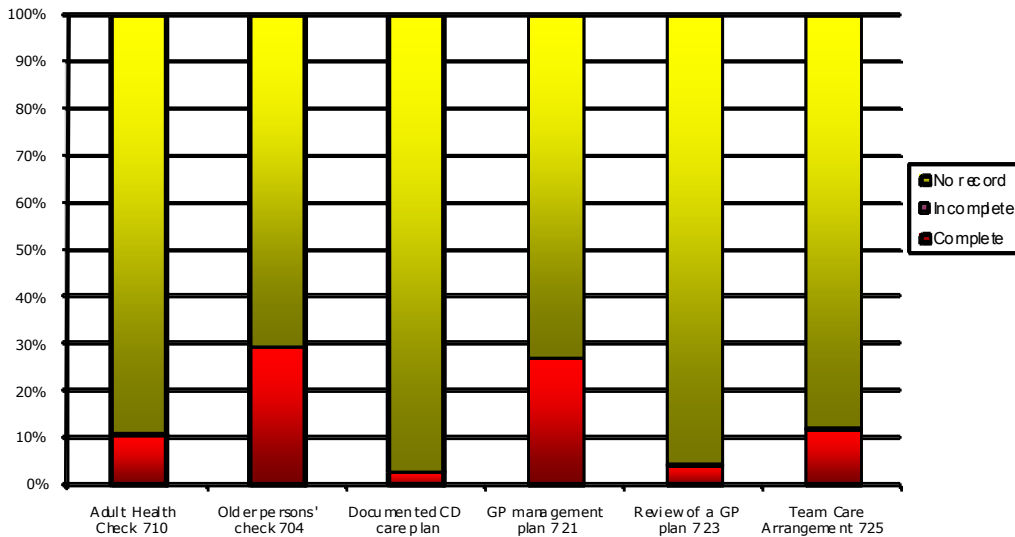

### Comment:

EPC items were recorded as complete if there was evidence in the record of a complete assessment and/or evidence of billing for that item. If there was evidence of an unclaimed or partially filled assessment it was recorded as incomplete.

EPC Medicare Items- National  
(For item 710 n=940, 704 n=225, 721-725 n=322)

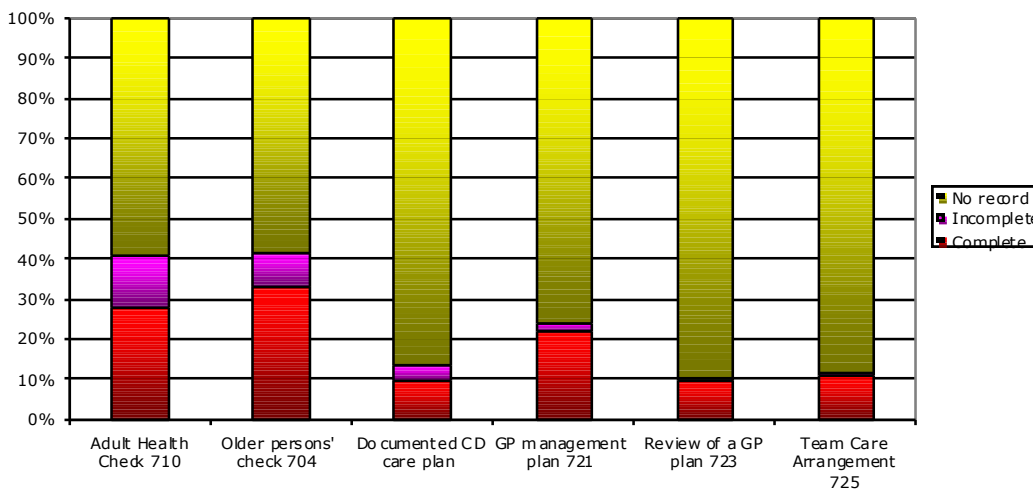

## Cardiovascular medicines prescribed

|                            | Total Sample |                    | Clients with Diabetes* |                   | Clients with CVD* |                   |
|----------------------------|--------------|--------------------|------------------------|-------------------|-------------------|-------------------|
|                            | XYZ<br>n=200 | National<br>n=1165 | XYZ<br>n=55            | National<br>n=249 | XYZ<br>n=27       | National<br>n=101 |
| Medications                | %            | %                  | %                      | %                 | %                 | %                 |
| Blood pressure lowering    | 30%          | 28                 | 66%                    | 76                | 82%               | 81                |
| Cholesterol lowering       | 27%          | 22                 | 69%                    | 64                | 74%               | 77                |
| Antiplatelet medication    | 18%          | 21                 | 44%                    | 62                | 63%               | 74                |
| BP + Statin + Antiplatelet | 11%          | 14                 | 29%                    | 42                | 44%               | 58                |

## Blood pressure management- prescribing patterns

### Comment:

*Treatment thresholds were based on the average of the two most recent systolic blood pressure recorded values*

*Treatment indications and target values were measured against the National Heart Foundation guidelines*

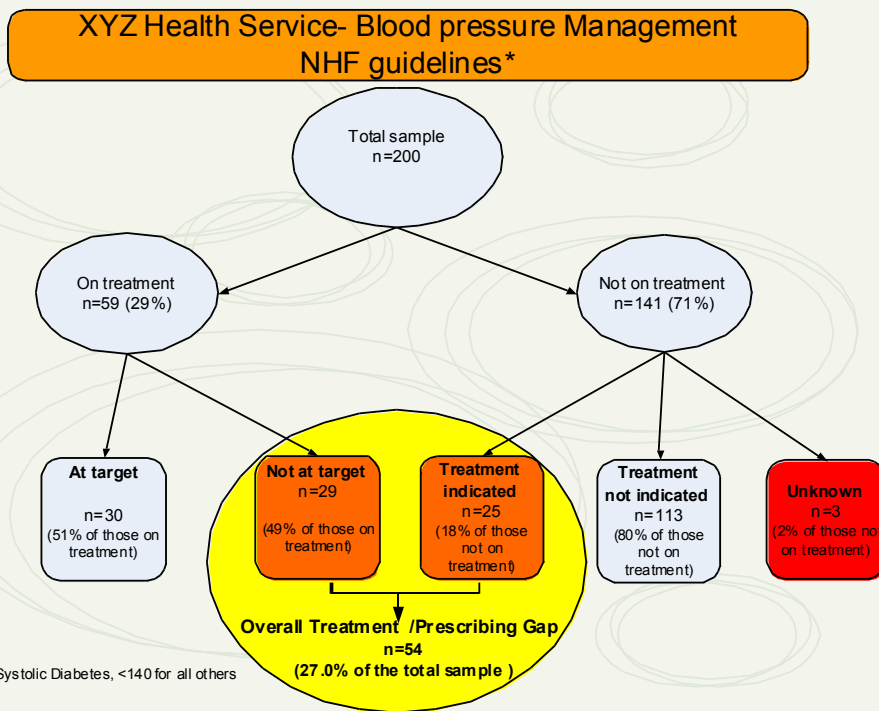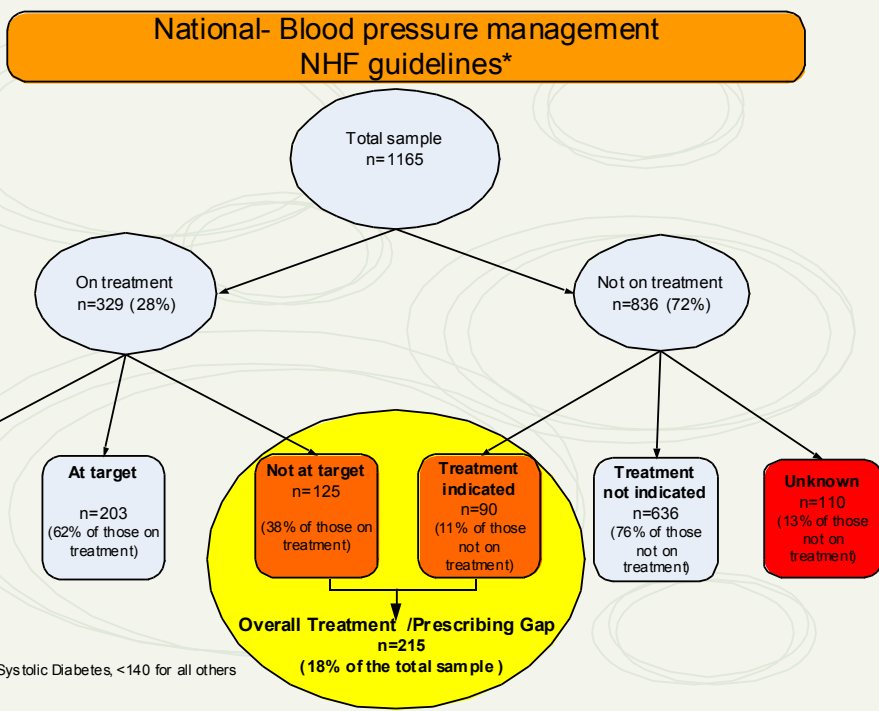

## Lipid management- prescribing patterns

### Comment:

Treatment thresholds were based on the most recent cholesterol results.

Treatment indications and target values were measured against the 2007 Pharmaceutical Benefits Scheme indications for Aboriginal and Torres Strait Islander people.

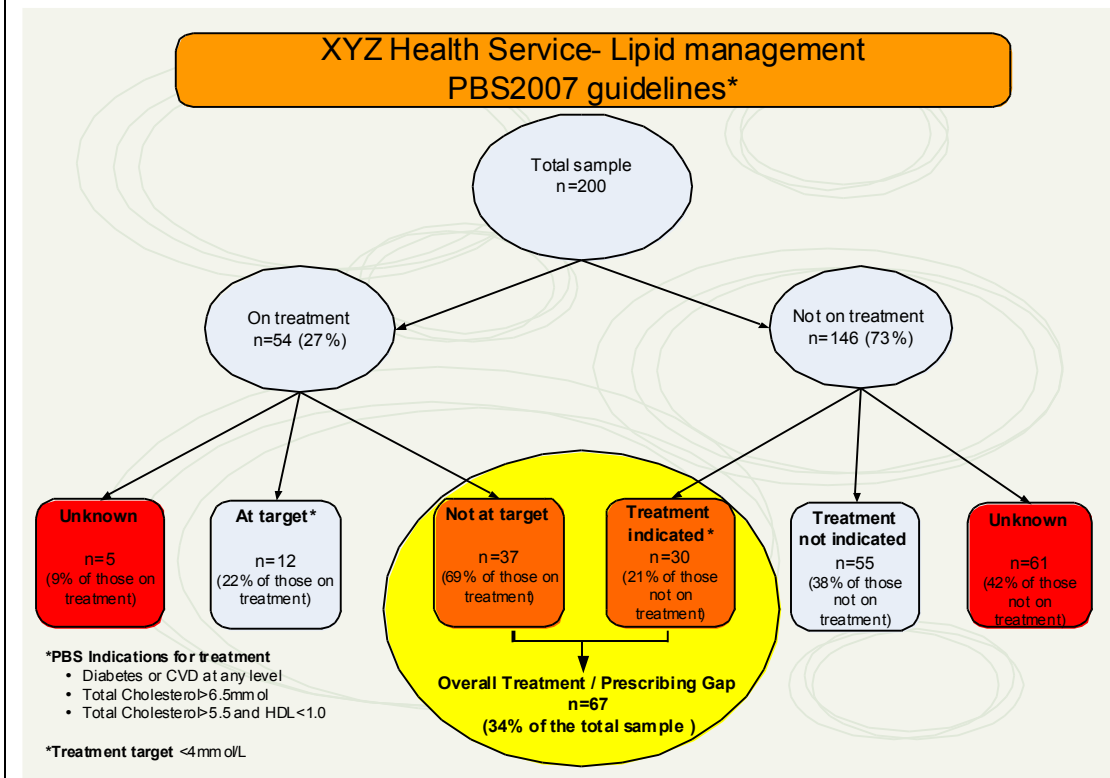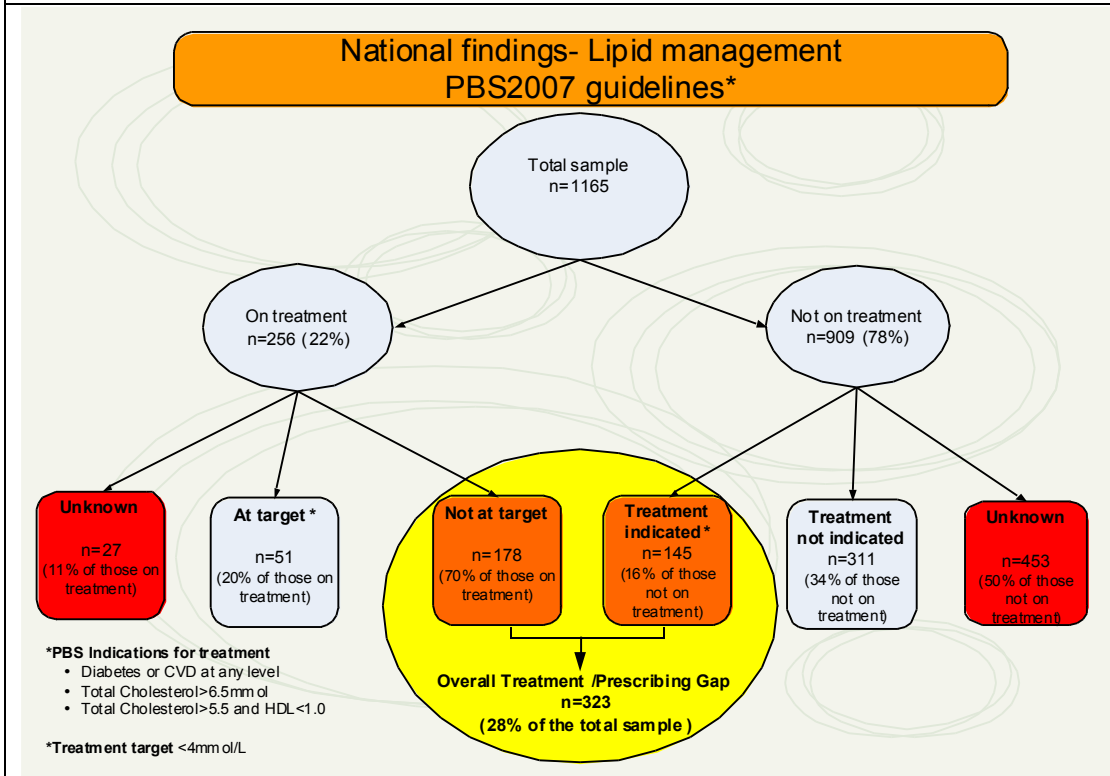

Supplement: MOESM3 [file 9530236]
